# Supplementary material for: Novel technique for endoscopic-assisted nipple-sparing mastectomy and immediate breast reconstruction with endoscopic-assisted latissimus dorsi muscle flap harvest through a single axillary incision: a retrospective cohort study of comparing endoscopic and open surgery
Source: PubMed Central journal article supplement — Gland Surg. 2022 Aug;11(8):1383–94. doi: 10.21037/gs-22-398 (PMC9445725; doi:10.21037/gs-22-398), 2022-08
Supplement: gs-11-08-1383-dss.pdf [file gs-11-08-1383-dss.pdf]

## Data Sharing Statement

|                     |                                                                                                                                                     |                                                                                                         |
|---------------------|-----------------------------------------------------------------------------------------------------------------------------------------------------|---------------------------------------------------------------------------------------------------------|
| <b>Article Info</b> | <a href="https://dx.doi.org/10.21037/gc-22-398">https://dx.doi.org/10.21037/gc-22-398</a>                                                           |                                                                                                         |
| <b>Item</b>         | <b>Question</b>                                                                                                                                     | <b>Authors' Response<br/>(place "-" if not applicable)</b>                                              |
| 1                   | Would you like to share data collected for your study to others?                                                                                    | Yes.                                                                                                    |
| 2                   | If not, would you like to share the reason for your decision?                                                                                       | -                                                                                                       |
| 3                   | What data in particular will be shared?                                                                                                             | The operation time, postoperative complication data and surgical techniques will be shared.             |
| 4                   | Any other documents will be shared? Such as study protocol, statistical analysis plan, informed consent form, clinical study report, analytic code. | Informed consent forms will also be shared if requested.                                                |
| 5                   | When will data availability begin?                                                                                                                  | From the publication date.                                                                              |
| 6                   | When will data availability end?                                                                                                                    | Two years within the publication date, since the technique may be updated over time.                    |
| 7                   | To whom will you share the data?                                                                                                                    | Medical oncologists and breast surgeons who are interested in studies of endoscopic-assisted technique. |
| 8                   | For what type of analysis or purpose?                                                                                                               | For analysis to evaluate the safety of endoscopic-assisted technique in breast cancer patients.         |
| 9                   | How or where can the data/documents be obtained?                                                                                                    | Emails could be sent to the address below to obtain the shared data: docduzg@163.com.                   |
| 10                  | Any other restrictions?                                                                                                                             | No.                                                                                                     |
